# Supplementary material for: Impact of Snow Thermal Conductivity Schemes on pan-Arctic Permafrost Dynamics in CLM5.0
Source: Copernicus journal article supplement (doi:10.5194/egusphere-2024-1412), 2024-06-12
Supplement: Supplementary file [file egusphere-2024-1412-AC2-supplement.pdf]

## Author Response for “Impact of Snow Thermal Conductivity Schemes on pan-Arctic Permafrost Dynamics in CLM5.0” by Damseaux et al.

We extend our gratitude to the editor and the reviewers for their thorough evaluation and insightful comments on our original manuscript. Below, we address each comment in detail. To facilitate readability, the reviewers' comments are presented in black, and our responses are in blue. References cited in this document are either found in the original manuscript bibliography or listed at the end of this document.

Reviewer 1

### **General comments**

The paper of Damseaux et al. presents improved soil temperature and permafrost extent estimates using a new snow thermal conductivity scheme within CLM5.0. They highlight the importance of improved pan-arctic parametrisation in ecosystem models to achieve more realistic and robust predictions on permafrost thaw-related emissions and their impact on a regional and global scale. This study is within the scope of the journal, addresses a relevant research question, and will be of interest to the broader modelling community. I find that the article is well-written, and the results are clearly presented and discussed, however, I have some comments for the authors.

### **Specific comments**

1. The authors discussed the improved model performance using the Sturm et al. (1997) instead of the Jordan (1991) scheme to calculate snow thermal conductivity. I think it would be relevant to highlight that even though the implementation of the Sturm scheme is an efficient way of addressing the insulation capacity and soil temperature bias, the effects on model outputs will need to be re-evaluated after structural developments in the snow schemes (especially if those affect snow density, which is the basis of thermal conductivity calculation).

We agree that the implementation of the Sturm et al. (1997) scheme has indeed provided an effective way to address the insulation capacity and reduce soil temperature bias in our current model framework. Indeed, we explicitly recognize in lines 238-246 of the original manuscript the trade off in improved process representation of snow densification through explicit inclusion of wind speed, benefits dense snowpacks (particularly the creation of firn in polar environments) but degrades the simulation of tundra snowpacks where water vapour transport (not explicitly simulated) has an important influence.

Regarding the need to re-evaluate the Sturm scheme after future developments in the snow scheme, we will clarify in the manuscript that while the Sturm parametrization addresses

some current issues, it is not a panacea. We recommend its use because it represents a significant improvement in simulating snow insulation in the Arctic. However, future advancements in CLM snow scheme, particularly in relation to snow stratigraphy and water vapour transport, may necessitate further refinement of our approach to ensure continued accuracy in model outputs.

2. How would changes in snowpack properties e.g. snow density, liquid water content and snow depth change the preferential fit of the Sturm scheme over other thermal conductivity schemes e.g. when looking at conditions under different future climate scenarios?

**Snow density:** The Sturm thermal conductivity scheme is a function of snow density (Eq. 1 & Fig. A1). Increases in snow density (in CLM 5.0 using the van Kampenhout et al. 2017 formulation) will increase the thermal conductivity of the snowpack; this relationship is seen for all common snow thermal conductivity parameterisations. The reason the Sturm parameterisation is more appropriate has more to do with the unique structure of Arctic snowpacks, which seasonally develops a low-density depth hoar layer under a much higher density wind slab layer. CLM5.0 cannot currently represent the processes (vertical water vapour diffusion) that create this depth hoar layer. Therefore, the thermal conductivity of the whole snowpack using the bulk density of tundra snow (i.e. the average density of the whole snow column) is better represented in CLM5.0 using Sturm parameterisation (formulated using extensive snow measurements in Arctic tundra). Under future climate scenarios, the preferential fit of the Sturm parameterisation is unlikely to change if the van Kampenhout snow density formulation remains.

**Liquid water content:** A higher proportion of liquid water in the snowpack increases its bulk thermal conductivity because water is more thermally conductive than air. Consequently, if a larger percentage of water is present, more of the snowpack can refreeze, forming ice, which is the most thermally conductive of the three phases of water. While spatially discontinuous ice lenses can often form in Arctic snowpacks, they are usually 0.5 - 2 mm thick, so account for a very small percentage of the vertical snow column. Consequently, ice lenses from melt refreeze will have limited impact on thermal conductivity. When liquid water is present in snow it has a very large impact on thermal conductivity, but this is usually during very short lived (relative to the entire winter snow season) snow melt periods of relatively shallow snowpacks. Where the impact of the Sturm parameterisation is most effective is during the much longer ~6-9 months of snow-covered winter where it controls simulated soil temperatures and therefore has relevance to permafrost and carbon fluxes.

**Snow depth:** Based on measurements of soil and air temperature as well as snow depth, Wang et al. (2016) and Slater et al. (2017) found that there is no relationship between snow thermal conductivity and snow depth above an effective snow depth of 25 cm; i.e., effective snow thermal conductivity does not increase beyond this threshold.

3. Consider discussing the potential consequences of the significant soil temperature changes on a pan-arctic scale already in the Discussion (currently, these are brought up shortly in the Conclusion section, L339).

We will move the text describing implications for soil temperature changes from the Conclusion to the Discussion.

### **Minor comments**

L115: Can you specify why you have chosen the 0.8 m SWE limit e.g. was this motivated by observations?

We reverted the changes made by van Kampenhout et al. (2017) to the 0.8 m SWE limit to prevent unrealistically high snow depth values in pan-Arctic non-glaciated islands. van Kampenhout et al. (2017) increased this threshold to better represent ice sheet snow conditions. It should be noted that the 0.8 m SWE threshold is significantly above the measured SWE distribution in non-glaciated Arctic regions, as observed in data-rich studies such as Derksen et al. (2014), making it a suitable choice for our study. We will add these clarifications to the manuscript:

“In order to prevent unrealistic high values of snow heights observed in pan-Arctic non-glaciated islands, the snow initialization protocol was recalibrated with the snow water equivalent (SWE) reverted to its original value of 0.8 m, instead of 10 m as later proposed in van Kampenhout et al. (2017).”

L142: What is the uncertainty in the permafrost classes defined by the ESA-CCI data and how is it compared to the uncertainty of your model-data deviation?

From the land model output, we cannot produce any permafrost classes: a grid cell is either classified as permafrost or no permafrost. In addition, the grid cell size of the land model is at least 100 times the grid cell size of the ESA-CCI product, so the aggregation of the ESA-CCI product to the model grid cell size blurs the borders between the permafrost zones. Accordingly, the comparison already contains technically defined uncertainties, which is acknowledged in the manuscript in the comparison presented in Figure 7. The vast majority of grid cells in the ESA-CCI PFR product have assigned uncertainties below 50%, which makes it unlikely that these uncertainties would outweigh the uncertainties already included in the comparison. We will add this to the manuscript in the discussion of the permafrost extent comparison.

Figure 1. Please add the data references in the figure caption.

We will add the data references to the figure caption as requested.

“Location of the 295 borehole stations used. The size of each point represents the number of data records per station over the whole period and for all depths. The data sets are

sourced from the Permafrost Laboratory website, the GTN-P database, Nordicana D, and the Roshydromet network.”

Figure 2. The Celsius sign missing next to the colour bar.

We will add the Celsius sign next to the colour bar in Figure 2.

L193-: Please revise this long sentence for improved readability.

This sentence will be reconstructed into several sentences, as follows:

“The evaluation of the -1 m year-averaged soil temperature (Fig. \ref{fig:TSOldiffSturm}) compares the control and Sturm run results against the ESA-CCI dataset. The Sturm run significantly reduces the cold bias observed in the control run within tundra regions, including the West Siberian Plain, Central Siberian Plateau, Yakutsk Basin, Kolyma Lowland, and northern Canada. Similar improvements were observed at soil depths of -5 m and -10 m (not shown here).”

L206: What causes the cold bias gap in the control run?

As shown in the introduction, we hypothesize that the Jordan scheme has deficiencies under Arctic snow conditions. This leads to negative biases in ground temperatures, as thermal conductivities are too high. To test this hypothesis and to potentially improve model representation of ground temperature, we exchanged the Jordan scheme with the Sturm scheme, which is presented in the sensitivity simulation called the Sturm run. We will add an introduction to the section results that clearly relates the presentation of the results to our hypothesis.

Figure 3. I suggest adding an observed winter offset sub-figure next to the Control and Sturm run sub-figures to compare the model fit directly to observations using the two parametrisations.

Unfortunately, we did not have access to snow depth data for each station in our dataset, so we are unable to create the figure based on observations as suggested. We also reached out to the authors of Wang et al. (2016) to reproduce their figure, but they were unable to provide us with the necessary data.

Section 3.3. How did the limitation of SWE to 0.8 m affect the simulation of permafrost fringe areas e.g. in mountainous regions? (or were these areas filtered out from your spatial analysis?)

The reverted change in SWE primarily affects the non-glaciated pan-Arctic islands where excessive snow accumulation was observed, as discussed in <https://github.com/ESCOMP/CTSM/discussions/1893>. This adjustment very likely does not impact other permafrost fringe areas, such as mountainous regions in figure 7, where no

relevant changes of snow depth have been observed between the default configuration and the run with reverted changes.

L248: Consider rephrasing “This observation is particularly remarkable...”. As I understand this finding supports your hypothesis that the Sturm scheme provides an improved simulation of winter offset (as you mention in L249).

These sentences will be rephrased, as follows:

“The spatial distribution of the winter offset in the Sturm run better aligns with previous findings \citep{Wang2016} compared to the control run, despite the minimal difference in effective snow depth between the two runs (below +/- 5% in most regions, see Fig. \ref{fig:effective\_snow}). This supports our hypothesis that the snow insulation in the Sturm simulation is considerably increased and generally more representative of tundra snowpacks.”

L362: typo: Brown et al. (data)

The typo will be fixed.

Figure A3.: Please consider changing the colour scale for increased readability (e.g. to a gradient from light to dark with increasing effective snow depth). Add “depth” and the unit (m) on the colour bar and figure caption. Alternatively, you could present a figure with the difference in effective snow depth between the Control and Sturm runs instead of the absolute values, to better visualise the spatial differences.

As rightly suggested, we will update Figure A3 with a percentage change figure between the Control and Sturm runs.

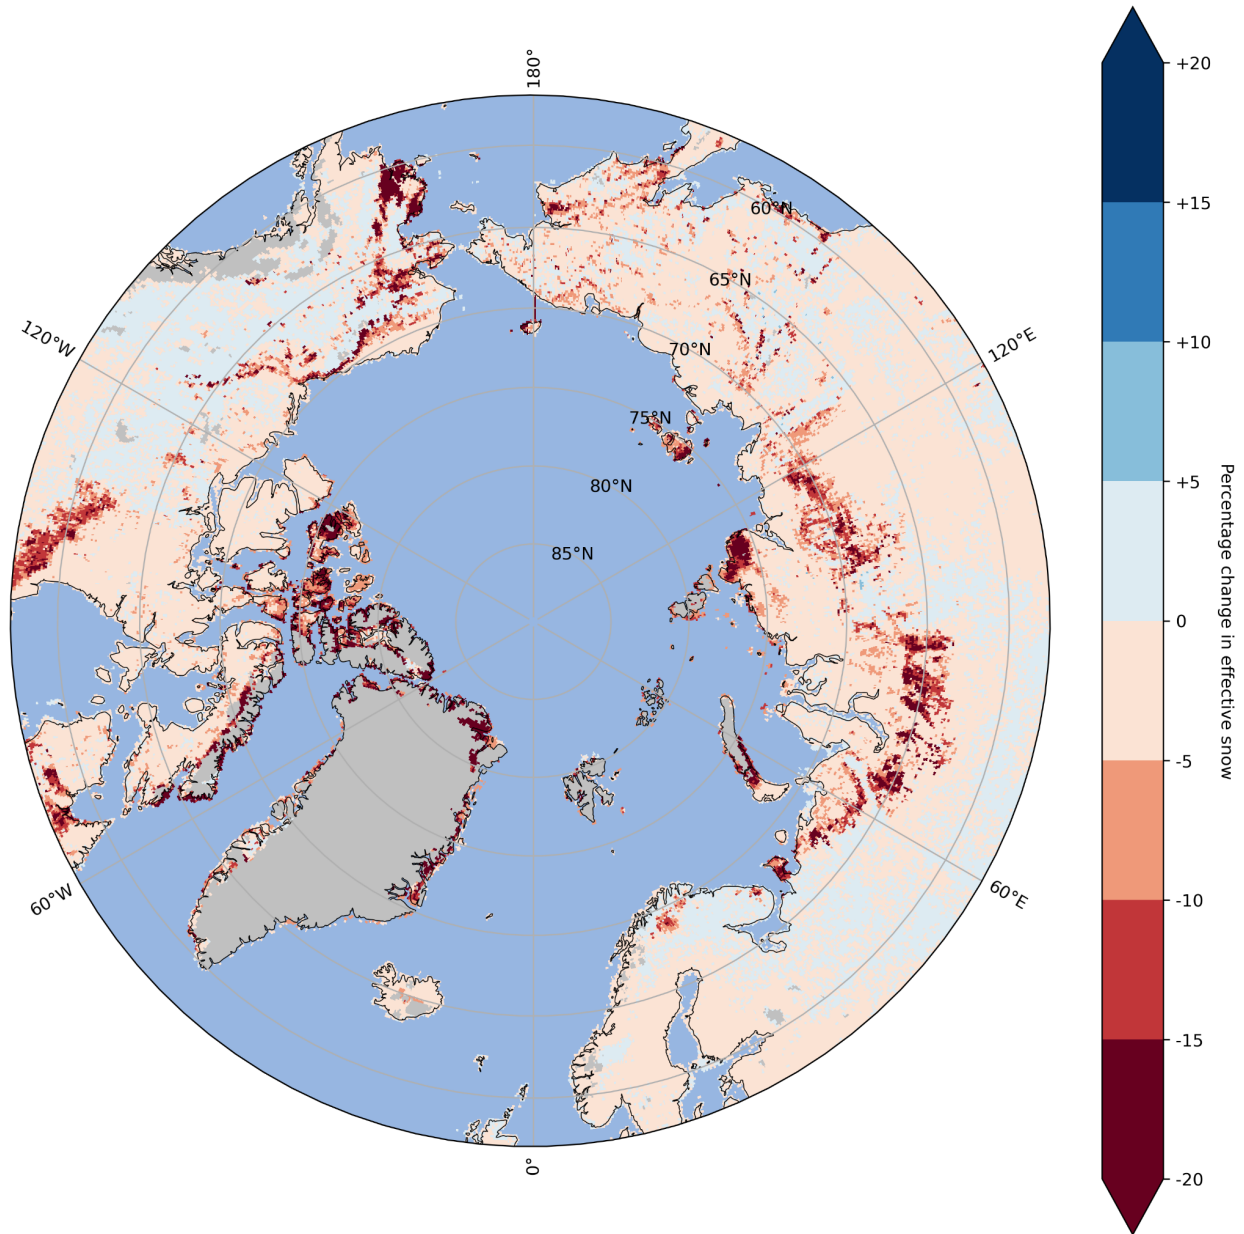

Caption: “Percent change in effective snow depth (1980-2021 period average) between the control and Sturm runs. Darker red indicates that the Sturm run effective snow is lower than the control run. The grey mask represents glaciers.”

The appendix chapter will also be adjusted to account for these changes.

Figure A3. caption: missing word “depth” in: “Period (1980 to 2021) average of effective snow *depth*...”

This figure caption will be updated.

## Reviewer 2

The paper introduces a new snow thermal conductivity parametrization in CLM5.0, which is believed to be more adapted to Arctic snow. The default (Jordan) and new parametrization (Sturm) are compared to one another, to ESA CCI products and to in situ soil temperature data. The authors argue that the new parametrization is more representative of tundra snowpacks and is an important development in understanding changes in permafrost.

The response of permafrost and its stored carbon stocks to climate change is an important topic and a huge source of uncertainty. One of the many reasons for this uncertainty is the role of snow thermal insulation in models. As such, the topic addressed in this paper is important.

Nevertheless, there are two major issues I would like to see addressed, both of which are related to one another and to the only variable used in the Sturm parametrization i.e. snow density:

1. The authors state that snow density in the Arctic is poorly represented in most LSMs, including in CLM. Given that their new parametrization is based on measurements, wouldn't it require snow densities simulations to be representative of Arctic snowpack in order to be effective? In lines 239-246, the authors suggest that snowpack insulation in CLM4.5 was "acceptable" due to errors in snowpack density being compensated by high thermal conductivity. This error compensation was then disrupted with the introduction of the new snow scheme. By proposing to us a snow thermal conductivity parametrization that works with snow densities that are still not well simulated by CLM5.0, is the Sturm parametrization also not compensating for an error elsewhere? Compensating for errors in models is widespread and can be valuable, but since CLM5.0 is widely used by the scientific community, the authors need to address this clearly in the manuscript in order for future users to understand fully the limitations and compensations involved in the new parametrization.

The reviewer raises an important point about the potential for error compensation within our proposed parametrization. While it is true that the snow densities simulated by CLM5.0 (and most LSMs) are not fully representative of Arctic snowpacks, there have been clear improvements in CLM5.0 (Lawrence et al., 2019). This limitation exists because these models do not attempt to capture the complex stratigraphy and processes within snow layers, such as vapor transport, as mentioned in the manuscript. Accurately simulating these processes would be computationally prohibitive; therefore, a simplified approach like our proposition is necessary.

In an ideal scenario where CLM had a more accurate representation of snow density profiles, the Jordan scheme might perform adequately, as it did in CLM4.5. However, we believe the Sturm scheme would likely still perform better due to its closer alignment with Arctic snow conditions. Given the current limitations of global LSMs, including CLM5.0, this

hypothesis cannot be fully tested and may not be testable in the foreseeable future. Therefore, we propose using the Sturm scheme because it better aligns with the physical characteristics of Arctic snow and has demonstrably improved model performance in our simulations.

We will clarify in the manuscript that while the Sturm parametrization addresses some issues within the current snow model, it is not a panacea. We recommend its use because it represents a step forward in accurately simulating snow insulation in the Arctic, but future improvements in snow density modeling could further refine or even replace this approach.

2. There is no attempt to evaluate the variable (snow density) upon which the new parametrization depends at any stage in the manuscript. Comprehensive data on Arctic in situ snow density measurements are lacking, and, even if there were any, similar scale issues as highlighted by the authors in lines 276-284 with regards to soil data would likely arise. As such, a sensitivity analysis of the snow thermal conductivity parametrization to modeled snow density is essential. This analysis would help determine whether the new parametrization is robust and will remain effective even if the cold bias introduced by the new fresh snow density function is later corrected, or if it is merely a temporary fix with some underlying empirical grounding that compensates for an error elsewhere.

We acknowledge the importance of evaluating the variable upon which the new parametrization depends, particularly snow density. While comprehensive in situ data on Arctic snow density are indeed scarce, and scale issues regarding soil data are likely to arise, our study sought to evaluate the robustness of the Sturm functional relationship within the context of a climatological analysis.

By examining a large number of data points across 41 years of simulations, we have tested the robustness of the Sturm parametrization under a wide range of snow densities, snow depths, air temperatures, and soil temperatures. While our evaluation is not process-based, it does reflect the broader climatological patterns we aimed to investigate. This approach aligns with our primary interest in understanding the overall climatological impacts rather than focusing on a process-level analysis. This will be emphasized in the revised manuscript.

We would like to highlight that the snow density improvements in CLM5.0, as mentioned in Lawrence et al. (2019), indicate that bulk snow density is now more reasonable than it was in CLM4.5, within the data limitations noted by both us and the reviewer. Although a detailed process-level sensitivity analysis of snow thermal conductivity parametrization to modeled snow density would indeed be valuable, it falls outside the scope of this paper, which focuses on large-scale climatological behavior.

The Sturm scheme is grounded in empirical relationships that are more representative of Arctic snow types, particularly depth hoar and wind slab formations, rather than mid-latitude



or polar snowpacks. Though this approach may compensate for some model inaccuracies, it remains physically justified. The fitted relationships between snow density and conductivity, as shown by Calonne et al. (2011), demonstrate variability based on measurement types and locations. Therefore, while the Sturm scheme provides a practical solution, it is supported by solid physical reasoning.

For consideration: Although I would like the authors to consider the following questions, they may choose to ignore them if they wish, as these questions pertain to the study's legacy and broader impact. Was this study done in collaboration with the CLM5.0 team? Does this paper document the introduction of the Sturm parametrization in CLM5.0 i.e. has it already been or will soon be added as an option for users? If so, clarification on this would be useful and would assist future users as this would contribute to good research practice as part of ongoing model documentation. If the CLM5.0 team was not involved or is unaware of this study, I wonder if the authors may be willing to explain the reasons for that; I would expect that it is easier to work with the group of the model one is trying to improve rather than in isolation.

This study was conducted in close collaboration with the CTSM team. We were particularly motivated to publish this work as we believed it might address an issue with plant mortality observed in the upcoming version of CTSM, which will be used in CESM3. This issue has been discussed in detail here: [https://github.com/NCAR/LMWG\\_dev/discussions/3](https://github.com/NCAR/LMWG_dev/discussions/3).

We have shared our findings with the CTSM team, and together, we have implemented the Sturm parameterization as an option in the current master branch of the model. However, this option still requires more testing with the coupled model and is not yet present in a published CTSM/CESM version. This is why we have not shared it in the manuscript.

We hope this addition will eventually assist future users and contribute to good research practices as part of ongoing model documentation.

#### **Minor comments:**

- Section 2.1 includes a brief model description of the snow module, but lacks details on soil representation. While I obtained some of this information from Lawrence et al. (2019), the reviewed paper includes “permafrost” in its title, therefore I don’t think it would be superfluous to include some critical information about how soil is represented e.g. how many soil layers are there in CLM5.0, and what are their thicknesses and depths? Given the different thermal properties of mineral and organic soil, concise information about their representation would also be welcome. Such information is essential for context, particularly for statements like *“the improvement is less pronounced in deeper layers, as the properties of soil increasingly dominate snow insulation properties at depth”* (L210-212).

We will add a subsection “soil” in the model description:

“The model soil stratigraphy includes 25 soil layers distributed geometrically, with thinner layers at shallower depths and larger layers at greater depths up to -50 meters. CLM5.0 has an increased soil layer resolution compared to CLM4.5, particularly in the upper -3 meters, to more accurately represent the Active Layer Thickness (ALT) in permafrost areas (Lawrence et al., 2019).

The heat transfer equation (Eq. 6.4 in Lawrence et al. (2018)) is numerically solved to compute soil temperatures across the 25-layer column, assuming a heat flux of zero at the bottom of the soil column. Soil temperatures are evaluated at each time step to assess phase changes in water and account for latent heat uptake and release. Hydrological calculations are conducted in the upper 20 soil layers, while the 5 bedrock layers are impermeable to water. Vertical soil moisture transport in the model is driven by the water balance equation of the whole column system, considering infiltration, surface and subsurface runoff, gradient diffusion, gravity, canopy transpiration through root extraction, and interactions with groundwater, respecting the conservation of mass. Vertical soil water flux is computed using Darcy’s Law.

The model defines soil thermal and hydraulic conductivities using mineral soil parameterizations dependent on soil texture (sand, clay, and silt fractions) and organic matter density, as derived from Hugelius et al. (2013). These fractions vary across the first 10 layers but remain constant in the subsequent 15 layers.”

- L180 What does “approximately” linear” mean? L240 what is “acceptable” snow insulation? These terms are rather vague. Please define.

These terms will be changed, as follows:

“Conversely, the relationship between snow depth and winter offset is close to linear across all snow depths in the control run.”

“We hypothesize that the underestimation of snowpack density 240 by CLM4.5 (Lawrence et al., 2019) combined with the high thermal conductivity scheme from Jordan (1991) artificially resulted in snow insulation that adequately represents winter soil temperatures.”

- L225 “bias increase”: do you mean “warm” bias, “positive” bias...?

We mean a "positive bias". We will clarify this in the manuscript.

- Lines 290-292: Doesn’t snow type depend on meteorological conditions? In this case, one might argue that in a physically-based model like CLM, it may be more logical to incorporate various snow thermal conductivities based on the meteorological conditions/variables that result in different snow types rather than including different snow types explicitly. Additionally, whether different snow schemes are needed in LSMs to represent different snow types or whether improved

snow physics is required is open to debate. The authors may want to nuance these statements.

Snow type is indeed influenced by meteorological factors such as precipitation, wind speed, and air temperature, but it is also shaped by soil and land cover variables, such as soil temperature, soil moisture, or vegetation-controlled microclimates. While incorporating snow thermal conductivities based on these meteorological and land surface conditions could enhance model results, global models like CLM must balance accuracy with computational efficiency. Including all the physical processes required to explicitly capture such details would be computationally expensive and not practical at a global scale.

- L320- As well as, perhaps, the spatial (horizontal and vertical) variability of soil properties? Referring to my first minor comment, it is important that a paper about permafrost does not forget soil properties and the potential sources of errors coming from the soil representation.

It is true that ESMs often lack detailed representation of soil properties, which can also be a significant source of error in permafrost modeling, as we discussed in lines 273-275 of the manuscript. However, our focus in this paper was specifically the spatial and temporal variability of snow insulation; addressing soil properties was beyond the scope of our study.

We will adapt the sentence to reflect this broader context: "However, Earth System Models (ESMs) often lack sufficient detail regarding the spatial and temporal variability of snow insulation, among other factors."

Additionally, we conducted an unpublished sensitivity experiment on soil thermal properties, by altering soil texture and organic matter density default input datasets. This experiment, named the Obu run, departs from the conventional use of coarse-resolution global data in LSMs by applying a Plant Functional Type (PFT)-based approach to derive soil texture and organic matter density. The figure below compares the results from Figure 6 with those from the Obu experiment. Our findings indicate that while soil thermal properties play a role during the summer, their impact is less significant compared to the snow insulation effects discussed in this paper, particularly during winter when the control run exhibits the most bias. This is because the insulating properties of snow cover significantly dampen soil thermal dynamics in winter, as discussed in Zhu et al. (2019).

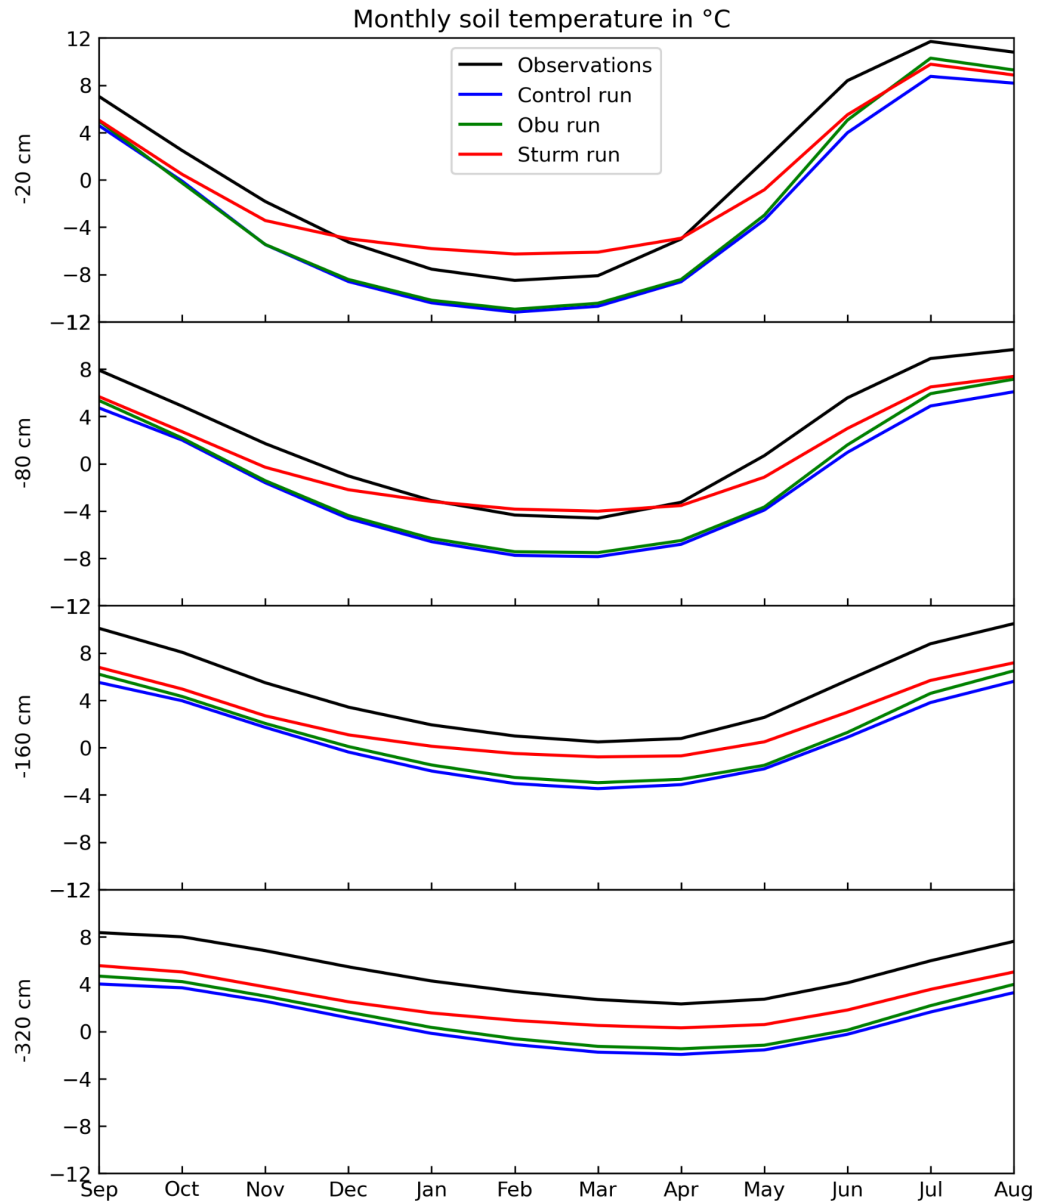

Caption: “Period averaged (1980-2021) of monthly soil temperature at 4 different depths (-20, -80, -160 and -320 cm) for the observations (black), control run (blue), Obu run (green), and Sturm run (red) in °C. All values come from an average of the 278 stations through the full period.”

Extra references not in our manuscript:

Derksen, C., Lemmetyinen, J., Toose, P., Silis, A., Pulliainen, J., & Sturm, M. (2014). Physical properties of Arctic versus subarctic snow: Implications for high latitude passive microwave snow water equivalent retrievals. *Journal of Geophysical Research Atmospheres*, 119(12), 7254–7270. doi:10.1002/2013jd021264.

Zhu, D., Ciais, P., Krinner, G., Maignan, F., Jornet Puig, A., & Hugelius, G. (2019). Controls of soil organic matter on soil thermal dynamics in the northern high latitudes. *Nat Commun*, 10(1), 3172. doi: 10.1038/s41467-019-11103-1.
